# Supplementary material for: Fighting addiction's death row: British Columbia Supreme Court Justice Ian Pitfield shows a measure of legal courage
Source: PubMed Central journal article supplement (PMC2611970; doi:10.1186/1477-7517-5-31), 2008-10-28

Junkies and drug pushers don't belong  
near children and families.

They should be in rehab or  
behind bars.

The Conservative Government will  
clean up drug crime.

- ✓ Punish drug pushers with more  
jail time
- ✓ Keep junkies in rehab and off  
the streets
- ✓ Crack down on cross border  
drug smuggling

Who do you think is  
on the right track  
on crime?

Check one →

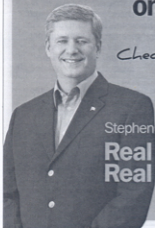

Stephen Harper

**Real Action.  
Real Results.**

|                                                                                    |                                                                     |                       |
|------------------------------------------------------------------------------------|---------------------------------------------------------------------|-----------------------|
|   | <b>Stéphane Dion</b><br><small>Liberal / Libéral</small>            | <input type="radio"/> |
|   | <b>Stephen Harper</b><br><small>Conservative / Conservateur</small> | <input type="radio"/> |
|   | <b>Jack Layton</b><br><small>NDP / NPD</small>                      | <input type="radio"/> |
|  | <b>Elizabeth May</b><br><small>Green / Vert</small>                 | <input type="radio"/> |

NAME \_\_\_\_\_ TELEPHONE \_\_\_\_\_  
ADDRESS \_\_\_\_\_ EMAIL \_\_\_\_\_  
CITY/TOWN \_\_\_\_\_  
PROVINCE \_\_\_\_\_ POSTAL CODE \_\_\_\_\_

Compliments of Rob Merrifield, MP



# safer?

No  
Postage  
Required

Rob Merrifield, MP  
c/o CRG-Government Caucus Services  
131 Queen Street, Suite 8-02  
House of Commons  
OTTAWA, ON K1A 0A6

1002

FOLD

Canadians work hard and play by the rules. But where in the rules does it allow junkies and addicts to threaten or steal from innocent families? What rule says that drug pushers should be able to feed off the weak and sick in our society? What rule says that drug gangs can terrorize neighbourhoods? The answer is clear. Thugs, drug pushers, and others involved in the drug trade are writing their own rules. For too long, lax Liberal governments left gangs and drug pushers to make their own rules and set their own criminal agenda. Those days are over.

The Conservative Government is acting to stop this sickening trade now. We are punishing drug pushers, getting junkies and addicts off the streets, and cracking down on the flow of illegal drugs at the border. This is real action that we are taking for all Canadians who have been harmed, one way or another, by the illicit drug trade. We're putting the health and safety of law-abiding families first.

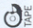

Supplement: 1477-7517-5-31-S6.pdf [file 1477-7517-5-31-S6.pdf]
